# Supplementary figures and images for: New insights into the electroreduction of ethylene sulfite as an electrolyte additive for facilitating solid electrolyte interphase formation in lithium ion batteries
Source: Royal Society of Chemistry journal article supplement (doi:10.1039/c6cp07646g), 2017-01-01

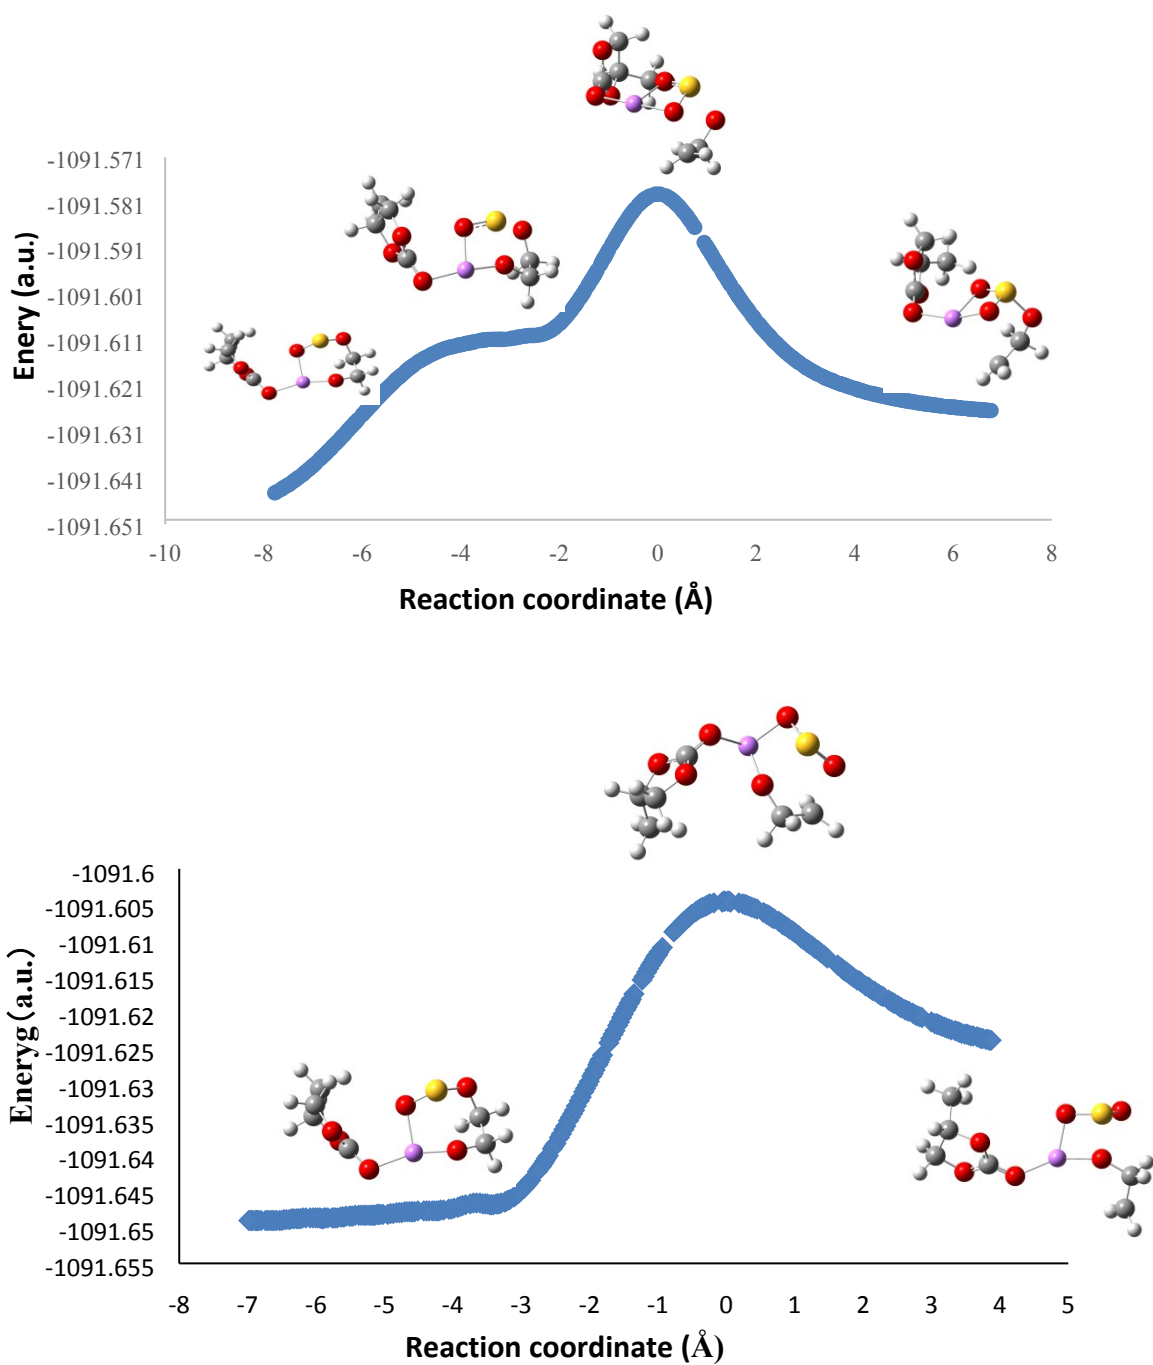

Figure S1. IRC calculations for the transition states 5 (top) and 7 (bottom).

Supplement: c6cp07646g1.pdf [file c6cp07646g1.pdf]
